# Supplementary material for: Associations of Ambient Environmental Conditions with Growth and Dissemination of Staphylococcus epidermidis on the Surface of Teatcups from Sheep Milking Parlours
Source: MDPI journal article supplement (doi:10.3390/bioengineering10010081), 2023-01-07
Supplement: s1 [file s1]

**Table S1.** Detailed findings of the recovery of two bacterial isolates (*S. epidermidis*) from the surface of teatcups made of silicone (for use in sheep), in temperature 21 °C and humidity 60%.

| Time after applica-<br>tion by smearing | Recoveries from<br>circular zone 1 | Recoveries from<br>circular zone 2 | Recoveries from<br>circular zone 3 | Total recoveries | Recoveries from<br>circular zone 1 | Recoveries from<br>circular zone 2 | Recoveries from<br>circular zone 3 | Total recoveries |
|-----------------------------------------|------------------------------------|------------------------------------|------------------------------------|------------------|------------------------------------|------------------------------------|------------------------------------|------------------|
|                                         | New teatcups                       |                                    |                                    |                  | Used teatcups                      |                                    |                                    |                  |
| Isolate A (biofilm-forming)             |                                    |                                    |                                    |                  |                                    |                                    |                                    |                  |
| 3 h                                     | 0/12                               | 0/12                               | 0/12                               | 0/36             | 0/12                               | 0/12                               | 0/12                               | 0/36             |
| 6 h                                     | 11/12                              | 1/12                               | 0/12                               | 12/36            | 0/12                               | 0/12                               | 0/12                               | 0/36             |
| 9 h                                     | 12/12                              | 12/12                              | 2/12                               | 26/36            | 6/12                               | 0/12                               | 0/12                               | 6/36             |
| 12 h                                    | 12/12                              | 12/12                              | 12/12                              | 36/36            | 11/12                              | 5/12                               | 2/12                               | 18/36            |
| 15 h                                    | 12/12                              | 12/12                              | 12/12                              | 36/36            | 12/12                              | 12/12                              | 7/12                               | 31/36            |
| 18 h                                    | 12/12                              | 12/12                              | 12/12                              | 36/36            | 12/12                              | 12/12                              | 12/12                              | 36/36            |
| 24 h                                    | 12/12                              | 12/12                              | 12/12                              | 36/36            | 12/12                              | 12/12                              | 12/12                              | 36/36            |
| Totals                                  | 71/84                              | 61/84                              | 50/84                              | 182/252          | 53/84                              | 41/84                              | 33/84                              | 127/252          |
| Isolate B (non biofilm-forming)         |                                    |                                    |                                    |                  |                                    |                                    |                                    |                  |
| 3 h                                     | 0/12                               | 0/12                               | 0/12                               | 0/36             | 0/12                               | 0/12                               | 0/12                               | 0/36             |
| 6 h                                     | 11/12                              | 1/12                               | 0/12                               | 12/36            | 0/12                               | 0/12                               | 0/12                               | 0/36             |
| 9 h                                     | 12/12                              | 11/12                              | 1/12                               | 24/36            | 4/12                               | 0/12                               | 0/12                               | 4/36             |
| 12 h                                    | 12/12                              | 12/12                              | 12/12                              | 36/36            | 9/12                               | 4/12                               | 1/12                               | 14/36            |
| 15 h                                    | 12/12                              | 12/12                              | 12/12                              | 36/36            | 11/12                              | 9/12                               | 9/12                               | 29/36            |
| 18 h                                    | 12/12                              | 12/12                              | 12/12                              | 36/36            | 12/12                              | 12/12                              | 12/12                              | 36/36            |
| 24 h                                    | 12/12                              | 12/12                              | 12/12                              | 36/36            | 12/12                              | 12/12                              | 12/12                              | 36/36            |
| Totals                                  | 71/84                              | 60/84                              | 49/84                              | 180/252          | 48/84                              | 37/84                              | 34/84                              | 119/252          |

**Table S2.** Detailed findings of the recovery of two bacterial isolates (*S. epidermidis*) from the surface of teatcups made of silicone (for use in sheep), in temperature 21 °C and humidity 80%.

| Time after applica-<br>tion by smearing | Recoveries from<br>circular zone 1 | Recoveries from<br>circular zone 2 | Recoveries from<br>circular zone 3 | Total recoveries | Recoveries from<br>circular zone 1 | Recoveries from<br>circular zone 2 | Recoveries from<br>circular zone 3 | Total recoveries |
|-----------------------------------------|------------------------------------|------------------------------------|------------------------------------|------------------|------------------------------------|------------------------------------|------------------------------------|------------------|
| New teatcups                            |                                    |                                    |                                    |                  | Used teatcups                      |                                    |                                    |                  |
| Isolate A (biofilm-forming)             |                                    |                                    |                                    |                  |                                    |                                    |                                    |                  |
| 3 h                                     | 1/12                               | 0/12                               | 0/12                               | 1/36             | 1/12                               | 0/12                               | 0/12                               | 1/36             |
| 6 h                                     | 12/12                              | 10/12                              | 7/12                               | 29/36            | 11/12                              | 10/12                              | 6/12                               | 27/36            |
| 9 h                                     | 12/12                              | 12/12                              | 12/12                              | 36/36            | 12/12                              | 12/12                              | 12/12                              | 36/36            |
| 12 h                                    | 12/12                              | 12/12                              | 12/12                              | 36/36            | 12/12                              | 12/12                              | 12/12                              | 36/36            |
| 15 h                                    | 12/12                              | 12/12                              | 12/12                              | 36/36            | 12/12                              | 12/12                              | 12/12                              | 36/36            |
| 18 h                                    | 12/12                              | 12/12                              | 12/12                              | 36/36            | 12/12                              | 12/12                              | 12/12                              | 36/36            |
| 24 h                                    | 12/12                              | 12/12                              | 12/12                              | 36/36            | 12/12                              | 12/12                              | 12/12                              | 36/36            |
| Totals                                  | 73/84                              | 70/84                              | 67/84                              | 210/252          | 72/84                              | 70/84                              | 66/84                              | 208/252          |
| Isolate B (non biofilm-forming)         |                                    |                                    |                                    |                  |                                    |                                    |                                    |                  |
| 3 h                                     | 0/12                               | 0/12                               | 0/12                               | 0/36             | 2/12                               | 0/12                               | 0/12                               | 2/36             |
| 6 h                                     | 12/12                              | 9/12                               | 8/12                               | 29/36            | 10/12                              | 5/12                               | 4/12                               | 19/36            |
| 9 h                                     | 12/12                              | 12/12                              | 12/12                              | 36/36            | 12/12                              | 12/12                              | 11/12                              | 35/36            |
| 12 h                                    | 12/12                              | 12/12                              | 12/12                              | 36/36            | 12/12                              | 12/12                              | 12/12                              | 36/36            |
| 15 h                                    | 12/12                              | 12/12                              | 12/12                              | 36/36            | 12/12                              | 12/12                              | 12/12                              | 36/36            |
| 18 h                                    | 12/12                              | 12/12                              | 12/12                              | 36/36            | 12/12                              | 12/12                              | 12/12                              | 36/36            |
| 24 h                                    | 12/12                              | 12/12                              | 12/12                              | 36/36            | 12/12                              | 12/12                              | 12/12                              | 36/36            |
| Totals                                  | 72/84                              | 69/84                              | 68/84                              | 209/252          | 72/84                              | 65/84                              | 63/84                              | 200/252          |

**Table S3.** Detailed findings of the recovery of two bacterial isolates (*S. epidermidis*) from the surface of teatcups made of silicone (for use in sheep), in temperature 31 °C and humidity 60%.

| Time after applica-<br>tion by smearing | Recoveries from<br>circular zone 1 | Recoveries from<br>circular zone 2 | Recoveries from<br>circular zone 3 | Total recoveries | Recoveries from<br>circular zone 1 | Recoveries from<br>circular zone 2 | Recoveries from<br>circular zone 3 | Total recoveries |
|-----------------------------------------|------------------------------------|------------------------------------|------------------------------------|------------------|------------------------------------|------------------------------------|------------------------------------|------------------|
| New teatcups                            |                                    |                                    |                                    |                  | Used teatcups                      |                                    |                                    |                  |
| Isolate A (biofilm-forming)             |                                    |                                    |                                    |                  |                                    |                                    |                                    |                  |
| 3 h                                     | 0/12                               | 0/12                               | 0/12                               | 0/36             | 0/12                               | 0/12                               | 0/12                               | 0/36             |
| 6 h                                     | 12/12                              | 3/12                               | 2/12                               | 17/36            | 0/12                               | 0/12                               | 0/12                               | 0/36             |
| 9 h                                     | 12/12                              | 12/12                              | 4/12                               | 28/36            | 10/12                              | 0/12                               | 0/12                               | 10/36            |
| 12 h                                    | 12/12                              | 12/12                              | 12/12                              | 36/36            | 12/12                              | 10/12                              | 4/12                               | 26/36            |
| 15 h                                    | 12/12                              | 12/12                              | 12/12                              | 36/36            | 12/12                              | 12/12                              | 12/12                              | 36/36            |
| 18 h                                    | 12/12                              | 12/12                              | 12/12                              | 36/36            | 12/12                              | 12/12                              | 12/12                              | 36/36            |
| 24 h                                    | 12/12                              | 12/12                              | 12/12                              | 36/36            | 12/12                              | 12/12                              | 12/12                              | 36/36            |
| Totals                                  | 72/84                              | 63/84                              | 54/84                              | 189/252          | 58/84                              | 46/84                              | 40/84                              | 144/252          |
| Isolate B (non biofilm-forming)         |                                    |                                    |                                    |                  |                                    |                                    |                                    |                  |
| 3 h                                     | 1/12                               | 0/12                               | 0/12                               | 1/36             | 0/12                               | 0/12                               | 0/12                               | 0/36             |
| 6 h                                     | 12/12                              | 4/12                               | 2/12                               | 18/36            | 2/12                               | 0/12                               | 0/12                               | 2/36             |
| 9 h                                     | 12/12                              | 12/12                              | 6/12                               | 30/36            | 8/12                               | 2/12                               | 0/12                               | 10/36            |
| 12 h                                    | 12/12                              | 12/12                              | 12/12                              | 36/36            | 12/12                              | 11/12                              | 5/12                               | 28/36            |
| 15 h                                    | 12/12                              | 12/12                              | 12/12                              | 36/36            | 12/12                              | 12/12                              | 12/12                              | 36/36            |
| 18 h                                    | 12/12                              | 12/12                              | 12/12                              | 36/36            | 12/12                              | 12/12                              | 12/12                              | 36/36            |
| 24 h                                    | 12/12                              | 12/12                              | 12/12                              | 36/36            | 12/12                              | 12/12                              | 12/12                              | 36/36            |
| Totals                                  | 73/84                              | 64/84                              | 56/84                              | 193/252          | 58/84                              | 49/84                              | 41/84                              | 148/252          |

**Table S4.** Detailed findings of the recovery of two bacterial isolates (*S. epidermidis*) from the surface of teatcups made of silicone (for use in sheep), in temperature 31 °C and humidity 80%.

| Time after applica-<br>tion by smearing | Recoveries from<br>circular zone 1 | Recoveries from<br>circular zone 2 | Recoveries from<br>circular zone 3 | Total recoveries | Recoveries from<br>circular zone 1 | Recoveries from<br>circular zone 2 | Recoveries from<br>circular zone 3 | Total recoveries |
|-----------------------------------------|------------------------------------|------------------------------------|------------------------------------|------------------|------------------------------------|------------------------------------|------------------------------------|------------------|
| New teatcups                            |                                    |                                    |                                    | Used teatcups    |                                    |                                    |                                    |                  |
| Isolate A (biofilm-forming)             |                                    |                                    |                                    |                  |                                    |                                    |                                    |                  |
| 3 h                                     | 2/12                               | 0/12                               | 0/12                               | 2/36             | 3/12                               | 0/12                               | 0/12                               | 3/36             |
| 6 h                                     | 12/12                              | 12/12                              | 10/12                              | 34/36            | 12/12                              | 8/12                               | 4/12                               | 24/36            |
| 9 h                                     | 12/12                              | 12/12                              | 12/12                              | 36/36            | 12/12                              | 12/12                              | 12/12                              | 36/36            |
| 12 h                                    | 12/12                              | 12/12                              | 12/12                              | 36/36            | 12/12                              | 12/12                              | 12/12                              | 36/36            |
| 15 h                                    | 12/12                              | 12/12                              | 12/12                              | 36/36            | 12/12                              | 12/12                              | 12/12                              | 36/36            |
| 18 h                                    | 12/12                              | 12/12                              | 12/12                              | 36/36            | 12/12                              | 12/12                              | 12/12                              | 36/36            |
| 24 h                                    | 12/12                              | 12/12                              | 12/12                              | 36/36            | 12/12                              | 12/12                              | 12/12                              | 36/36            |
| Totals                                  | 74/84                              | 72/84                              | 70/84                              | 216/252          | 75/84                              | 68/84                              | 64/84                              | 207/252          |
| Isolate B (non biofilm-forming)         |                                    |                                    |                                    |                  |                                    |                                    |                                    |                  |
| 3 h                                     | 2/12                               | 0/12                               | 0/12                               | 2/36             | 4/12                               | 0/12                               | 0/12                               | 4/36             |
| 6 h                                     | 12/12                              | 11/12                              | 9/12                               | 32/36            | 12/12                              | 11/12                              | 7/12                               | 30/36            |
| 9 h                                     | 12/12                              | 12/12                              | 12/12                              | 36/36            | 12/12                              | 12/12                              | 12/12                              | 36/36            |
| 12 h                                    | 12/12                              | 12/12                              | 12/12                              | 36/36            | 12/12                              | 12/12                              | 12/12                              | 36/36            |
| 15 h                                    | 12/12                              | 12/12                              | 12/12                              | 36/36            | 12/12                              | 12/12                              | 12/12                              | 36/36            |
| 18 h                                    | 12/12                              | 12/12                              | 12/12                              | 36/36            | 12/12                              | 12/12                              | 12/12                              | 36/36            |
| 24 h                                    | 12/12                              | 12/12                              | 12/12                              | 36/36            | 12/12                              | 12/12                              | 12/12                              | 36/36            |
| Totals                                  | 74/84                              | 71/84                              | 69/84                              | 214/252          | 76/84                              | 71/84                              | 67/84                              | 214/252          |
